# Supplementary material for: CaCl2 molten salt hydrate-promoted conversion of carbohydrates to 5-hydroxymethylfurfural: an experimental and theoretical study
Source: Royal Society of Chemistry journal article supplement (doi:10.1039/d0gc04356g), 2021-01-01
Supplement: d0gc04356g1.pdf [file d0gc04356g1.pdf]

## Supplementary Materials

# CaCl<sub>2</sub> Molten Salt Hydrate-promoted Conversion of Carbohydrates to 5-Hydroxymethylfurfural: An Experimental and Theoretical Study

Changqu Lin<sup>a, +</sup>, Chaoqun Chai<sup>b, +</sup>, Yuanzhang Li<sup>a</sup>, Jiao Chen<sup>a</sup>, Yanyu Lu<sup>a</sup>, Hongli Wu<sup>a</sup>, Lili Zhao<sup>b, \*</sup>, Fei Cao<sup>a, \*</sup>, Kequan Chen<sup>a</sup>, Ping Wei<sup>a</sup>, Pingkai Ouyang<sup>a</sup>

a, College of Biotechnology and Pharmaceutical Engineering, Nanjing Tech University  
30 South Puzhu Road, Nanjing, 211816 (P. R. China)

b, Institute of Advanced Synthesis, School of Chemistry and molecular Engineering, Nanjing  
Tech University  
30 South Puzhu Road, Nanjing, 211816 (P. R. China)

\*Corresponding author Email: [csaofeiw@njtech.edu.cn](mailto:csaofeiw@njtech.edu.cn), [ias\\_llzhao@njtech.edu.cn](mailto:ias_llzhao@njtech.edu.cn)

### Content

|                                                                                                                                                                                                                                                                                                        |    |
|--------------------------------------------------------------------------------------------------------------------------------------------------------------------------------------------------------------------------------------------------------------------------------------------------------|----|
| Table S 1 the results of isomerization of glucose in literature.....                                                                                                                                                                                                                                   | 3  |
| Table S 2 Effect of temperature and time on dehydration of fructose.....                                                                                                                                                                                                                               | 8  |
| Table S 3 The optimized structures, energy differences ( $\Delta G$ in hartree) for C <sub>6</sub> H <sub>12</sub> O <sub>6</sub> , $\alpha$ -D-Fructofuranose, $\beta$ -D-Fructofuranose and $\beta$ -D-Fructopyranose at the B3LYP/AUG-cc-pVDZ level.....                                            | 9  |
| Table S 4 The optimal structures, energy differences ( $\Delta E$ , $\Delta H$ , $\Delta G$ in kcal/mol) for Ca <sup>2+</sup> + $\alpha$ -D-Fructofuranose, Ca <sup>2+</sup> + $\beta$ -D-Fructofuranose and Ca <sup>2+</sup> + $\beta$ -D-Fructopyranose at the B3LYP/AUG-cc-pVDZ/cc-pVDZ level. .... | 10 |
| Table S 5 The isomers, energy differences ( $\Delta G$ in hartree) for Ca <sup>2+</sup> + $\beta$ -D-Fructofuranose at the B3LYP/ BSI level. ....                                                                                                                                                      | 10 |
| Table S 6 The isomers, energy differences ( $\Delta G$ in hartree) for Ca <sup>2+</sup> + $\alpha$ -D-Fructofuranose at the B3LYP/ BSI level. ....                                                                                                                                                     | 10 |
| Table S7 The isomers, energy differences ( $\Delta G$ in hartree) for Ca <sup>2+</sup> + $\beta$ -D-Fructopyranose at the                                                                                                                                                                              |    |

|                                                                                                                                                                                                                                                                                      |    |
|--------------------------------------------------------------------------------------------------------------------------------------------------------------------------------------------------------------------------------------------------------------------------------------|----|
| B3LYP/BSI level. ....                                                                                                                                                                                                                                                                | 11 |
| Table S8 Effect of reaction temperature and time on the dehydration of glucose to HMF .....                                                                                                                                                                                          | 12 |
| Table S9 the conversion (C)、 selectivity (S) and yield (Y) of dehydration of glucose into HMF .....                                                                                                                                                                                  | 13 |
| Table S10 Coordinates and energies (in hatree) of the calculated structures at the B3LYP/BSI level.....                                                                                                                                                                              | 14 |
| Figure S 1 <sup>1</sup> H NMR spectrum of glucose in D <sub>2</sub> O .....                                                                                                                                                                                                          | 4  |
| Figure S 2 <sup>1</sup> H NMR spectrum of glucose with CaCl <sub>2</sub> in D <sub>2</sub> O .....                                                                                                                                                                                   | 4  |
| Figure S 3 Optimized structures of the transition states <b>TS1-0~TS1-2</b> and the key intermediates along the pathway shown in Scheme S1. The key bond distances and the average bond length are in Å (color code, C: gray, H: white, O: red, Cl: green, Ca: yellow). .....        | 5  |
| Figure S 4 Optimized structures of the key intermediates along the pathway shown in Scheme 1. The key bond distances and the average bond length are in Å (color code, C: gray, H: white, O: red, Cl: green, Ca: yellow). .....                                                      | 6  |
| Figure S 5 Optimized structures of the transition states <b>TS1-a~TS1-d</b> along the pathway shown in Scheme S3. The key bond distances and the average bond length are in Å (color code, C: gray, H: white, O, Br: red, Cl: green, Ca, Mg: yellow, Sr: brown, Ba: dark red). ..... | 7  |
| Figure S 6 Effect of solution on the dehydration of fructose to HMF .....                                                                                                                                                                                                            | 8  |
| Figure S 7 2D DOSY NMR spectra of the fructose with CaCl <sub>2</sub> in D <sub>2</sub> O.....                                                                                                                                                                                       | 9  |
| Figure S 8 Optimized structures of the complexes in Table S4. The key bond distances and the average bond length are in Å (color code, C: gray, H: white, O: red, Cl: green, Ca: yellow). .....                                                                                      | 10 |
| Figure S 9 The dehydration of glucose into HMF in 17.9 or 25.6wt% CaCl <sub>2</sub> solution .....                                                                                                                                                                                   | 11 |
| Figure S 10 Effect of solution on the dehydration of glucose to HMF at 180°C for 120 min .....                                                                                                                                                                                       | 11 |
| Figure S 11. HMF crystal.....                                                                                                                                                                                                                                                        | 13 |
| Scheme S 1 Computed free energy profiles (in kcal/mol) for the different paths for the ring-opening step of cyclic pyranose. The electronic energies (in kcal/mol) are given in brackets for reference.....                                                                          | 5  |
| Scheme S 2 Complete catalytic cycle for the CaCl <sub>2</sub> -catalyzed isomerization of glucose to fructose.....                                                                                                                                                                   | 6  |
| Scheme S 3 Computed free energy profiles (in kcal/mol) for the different molten salt hydrates for the ring-opening step of cyclic pyranose. The electronic energies (in kcal/mol) are given in brackets for reference.....                                                           | 7  |
| Reference .....                                                                                                                                                                                                                                                                      | 30 |

Table S 1 the results of isomerization of glucose in literature

| Entry | Catalysts         | Glucose | Temperature (°C) | Conversion (%) | Yield of fructose (%) | Selectivity of fructose (%) | Liteature |
|-------|-------------------|---------|------------------|----------------|-----------------------|-----------------------------|-----------|
| 1     | CrCl <sub>3</sub> | 4.5wt%  | 120              | 52.00          | 25.00                 | 49.00                       | 1         |
| 2     | AlCl <sub>3</sub> | 4.5wt%  | 120              | 32.00          | 26.00                 | 83.00                       | 1         |
| 3     | SnCl <sub>4</sub> | 4.5wt%  | 120              | 18.00          | 5.00                  | 26.00                       | 1         |
| 4     | CrCl <sub>3</sub> | 10wt%   | 140              | 41.00          | 20.00                 | 48.78                       | 2         |
| 5     | ZrCl <sub>4</sub> | na      | 140              | 69.00          | 7.00                  | 10.14                       | 3         |
| 6     | Al-Ni-C           | 2wt%    | 170              | 59.00          | 19.00                 | 32.20                       | 4         |
| 7     | GIO-Al200         | 5wt%    | 140              | 53.23          | 34.60                 | 65.00                       | 5         |
| 8     | Sn-silicate       | 10wt%   | 110              | 23.40          | 16.70                 | 71.37                       | 6         |
| 9     | H-USY             | 9.1wt%  | 120              | 53.00          | 38.00                 | 71.70                       | 7         |
| 10    | Sn-Beta           | 10wt%   | 140              | 46.00          | 30.00                 | 65.22                       | 8         |
| 11    | Sn-Beta           | 1wt%    | 110              | 48.00          | 21.00                 | 43.75                       | 9         |
| 12    | Sn/deAl-β         | 10wt%   | 110              | 45.00          | 30.00                 | 66.67                       | 10        |
| 13    | CaCl <sub>2</sub> | 10wt%   | 80               | 42.00          | 33.60                 | 80.00                       | This work |

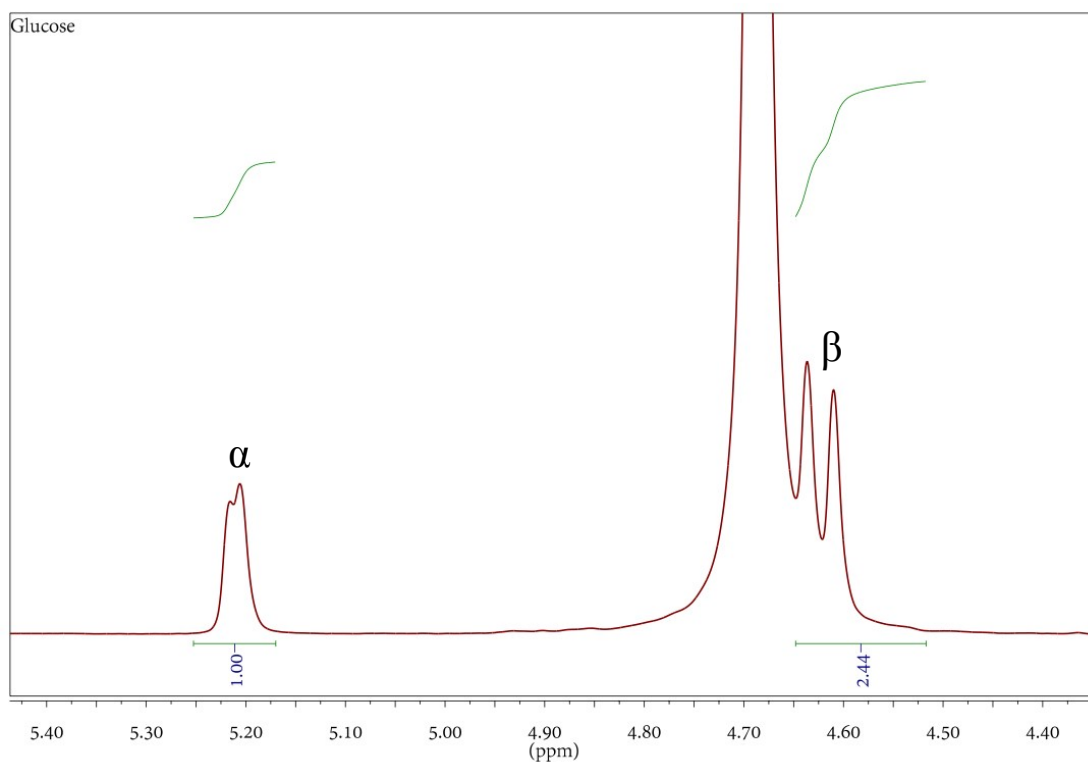

Figure S 1 <sup>1</sup>H NMR spectrum of glucose in D<sub>2</sub>O

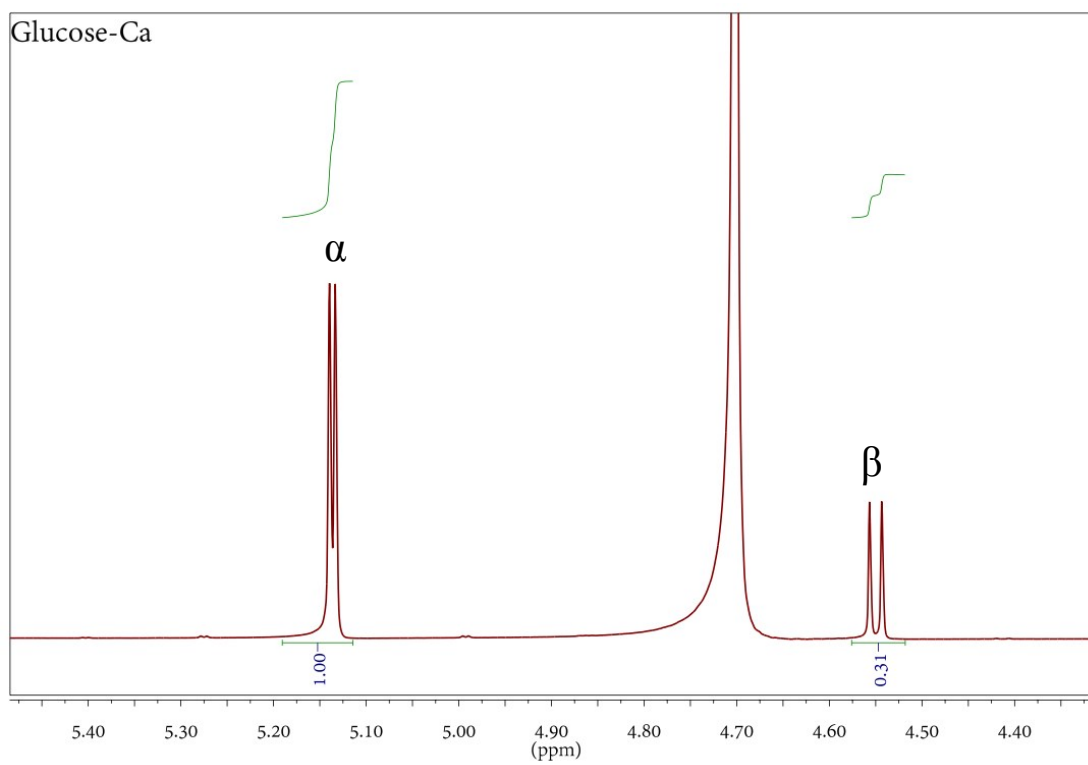

Figure S 2 <sup>1</sup>H NMR spectrum of glucose with CaCl<sub>2</sub> in D<sub>2</sub>O

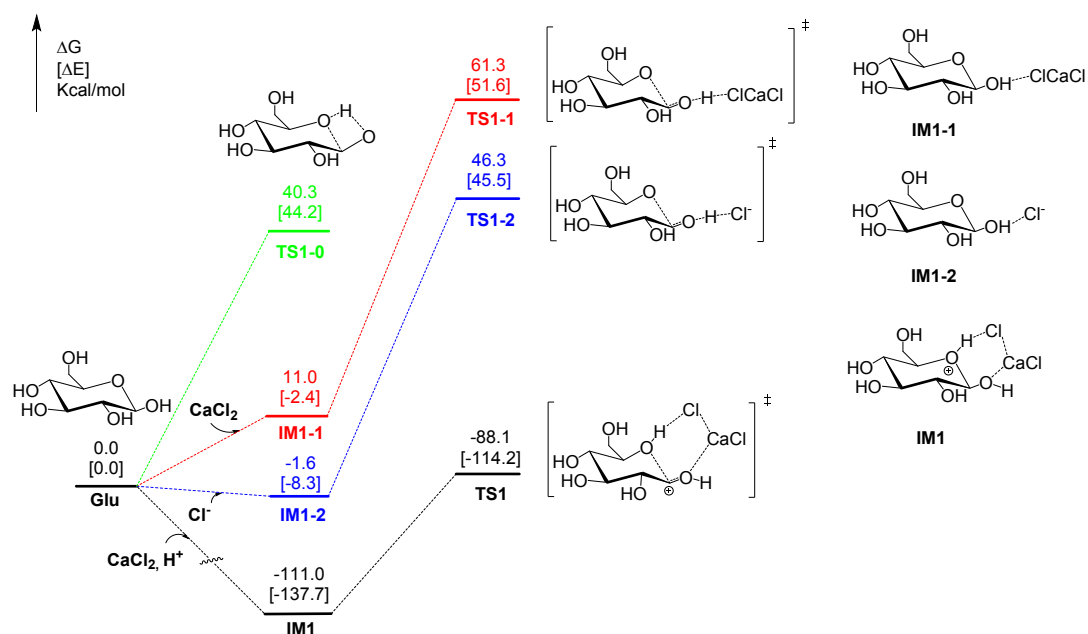

Scheme S 1 Computed free energy profiles (in kcal/mol) for the different paths for the ring-opening step of cyclic pyranose. The electronic energies (in kcal/mol) are given in brackets for reference.

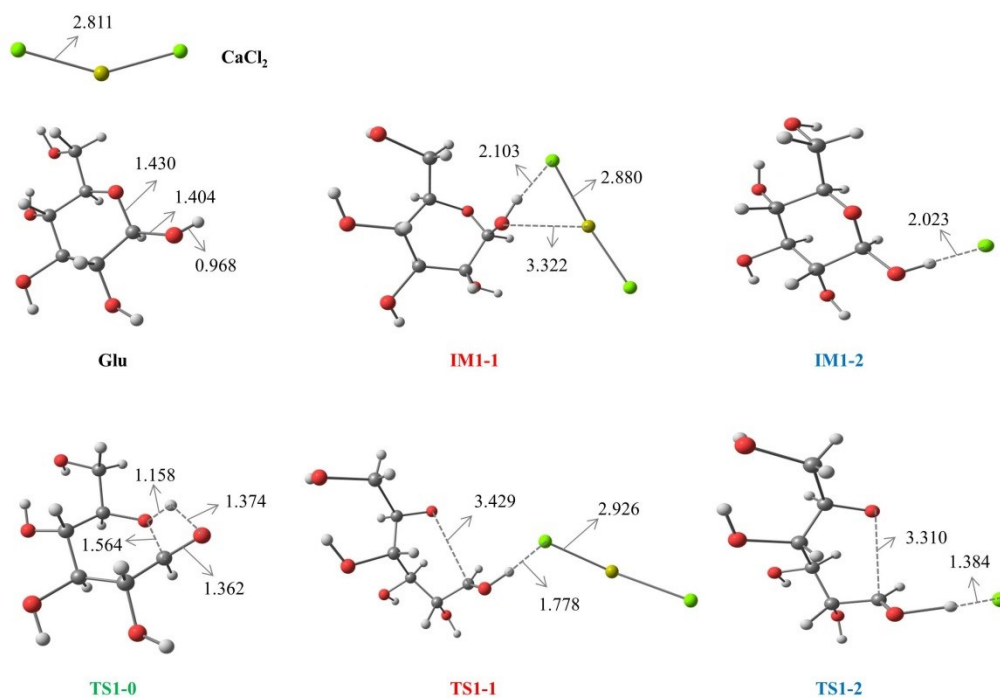

Figure S 3 Optimized structures of the transition states **TS1-0**–**TS1-2** and the key intermediates along the pathway shown in Scheme S1. The key bond distances and the average bond length are in Å (color code, C: gray, H: white, O: red, Cl: green, Ca: yellow).

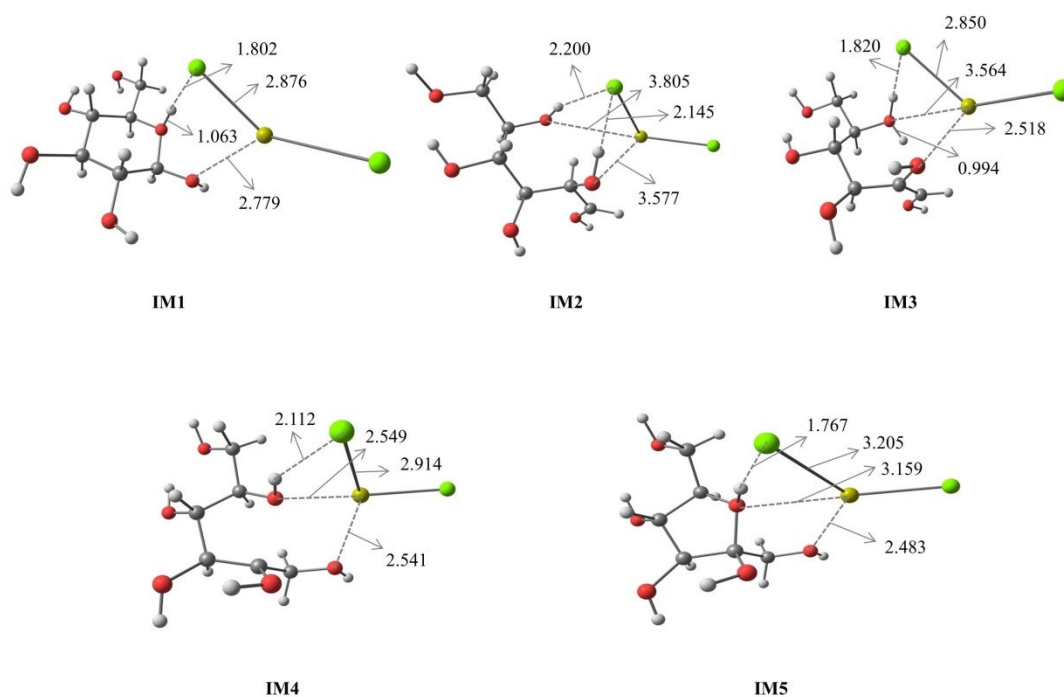

Figure S 4 Optimized structures of the key intermediates along the pathway shown in Scheme 1. The key bond distances and the average bond length are in Å (color code, C: gray, H: white, O: red, Cl: green, Ca: yellow).

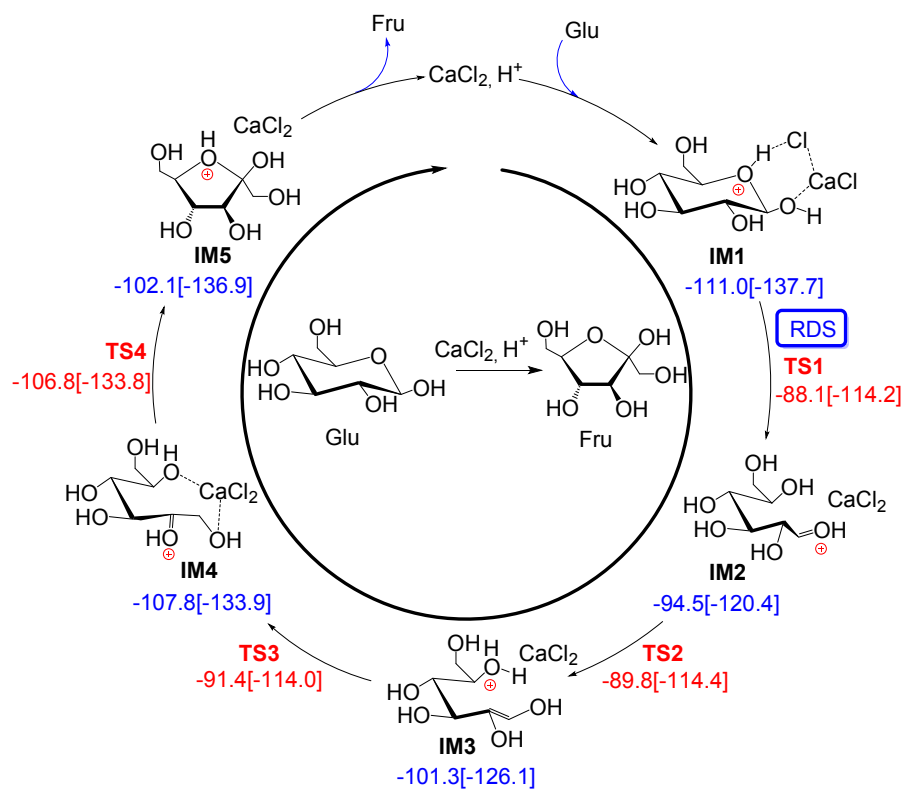

Scheme S 2 Complete catalytic cycle for the CaCl<sub>2</sub>-catalyzed isomerization of glucose to fructose.

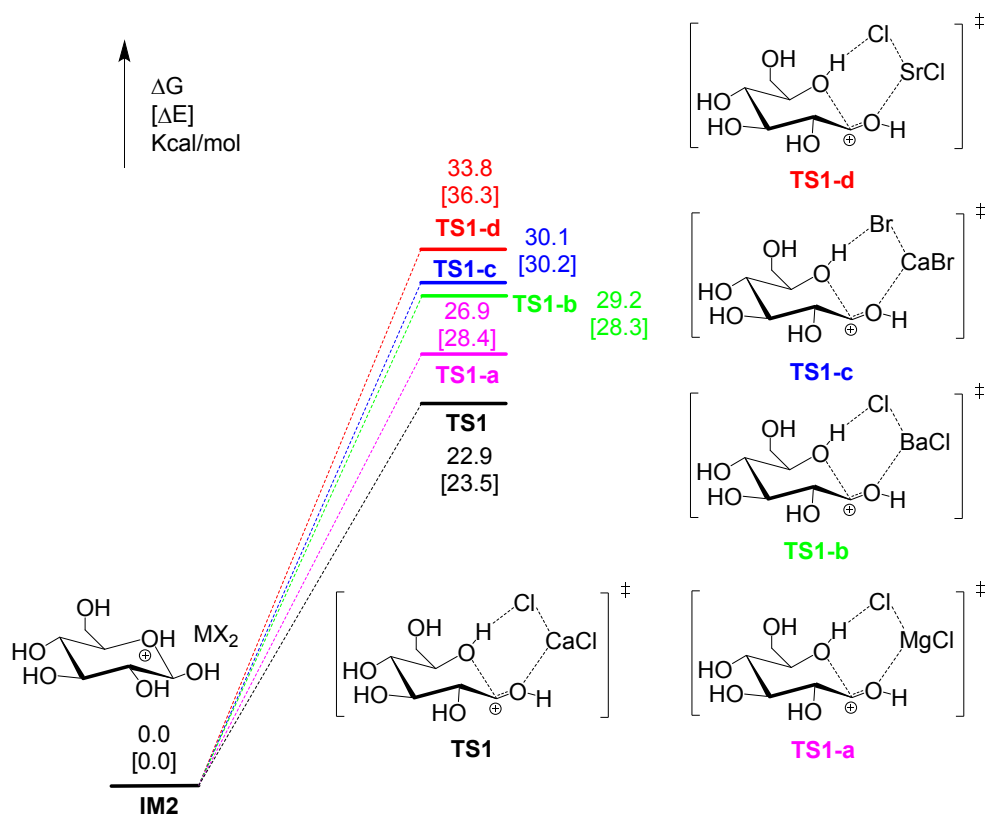

Scheme S 3 Computed free energy profiles (in kcal/mol) for the different molten salt hydrates for the ring-opening step of cyclic pyranose. The electronic energies (in kcal/mol) are given in brackets for reference.

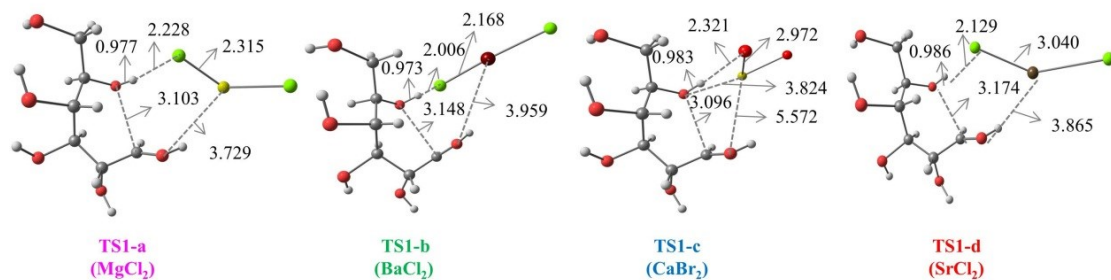

Figure S 5 Optimized structures of the transition states **TS1-a**~**TS1-d** along the pathway shown in Scheme S3. The key bond distances and the average bond length are in Å (color code, C: gray, H: white, O, Br: red, Cl: green, Ca, Mg: yellow, Sr: brown, Ba: dark red).

Table S 2 Effect of temperature and time on dehydration of fructose

| Temp.(°C) | Time(min) | Yield(%) | Con.(%) | Selectivity(%) |
|-----------|-----------|----------|---------|----------------|
| 140       | 60        | 25.21    | 40.37   | 62.46          |
| 140       | 120       | 45.62    | 76.22   | 59.85          |
| 140       | 180       | 59.53    | 100.00  | 59.53          |
| 140       | 240       | 54.23    | 100.00  | 54.23          |
| 150       | 30        | 32.49    | 75.00   | 43.32          |
| 150       | 60        | 47.87    | 84.70   | 56.51          |
| 150       | 90        | 51.39    | 90.75   | 56.62          |
| 150       | 120       | 61.63    | 100.00  | 61.63          |
| 150       | 150       | 56.97    | 100.00  | 56.97          |
| 150       | 180       | 53.85    | 100.00  | 53.85          |
| 160       | 30        | 39.44    | 76.47   | 51.58          |
| 160       | 60        | 47.73    | 86.00   | 55.50          |
| 160       | 90        | 65.57    | 100.00  | 65.57          |
| 160       | 120       | 57.02    | 100.00  | 57.02          |
| 170       | 120       | 49.27    | 100.00  | 49.27          |
| 180       | 120       | 47.08    | 100.00  | 47.08          |

Reaction condition: 100 g L<sup>-1</sup> fructose, 17.9wt% CaCl<sub>2</sub>, water/MeTHF=1/4.

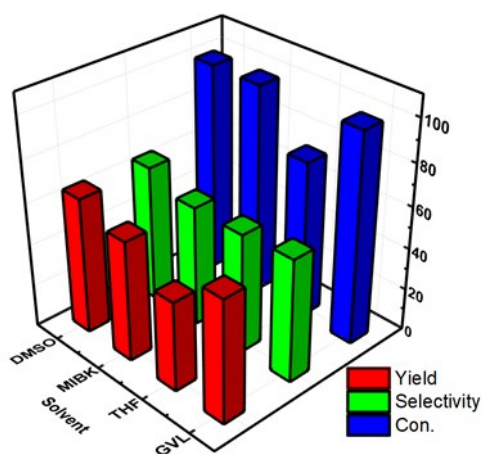

Figure S 6 Effect of solution on the dehydration of fructose to HMF



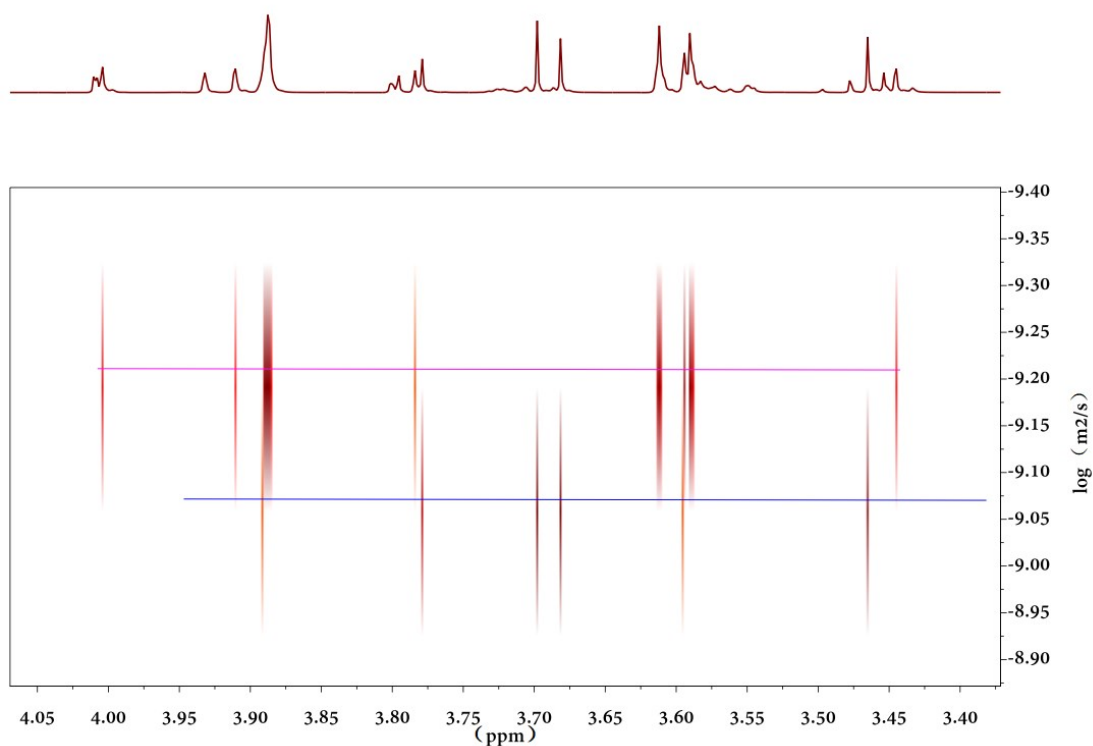

Figure S 7 2D DOSY NMR spectra of the fructose with  $\text{CaCl}_2$  in  $\text{D}_2\text{O}$

Table S 3 The optimized structures, energy differences ( $\Delta G$  in hartree) for  $\text{C}_6\text{H}_{12}\text{O}_6$ ,  $\alpha$ -D-Fructofuranose,  $\beta$ -D-Fructofuranose and  $\beta$ -D-Fructopyranose at the B3LYP/AUG-cc-pVDZ level.

|            | $\text{C}_6\text{H}_{12}\text{O}_6$ | $\alpha$ -D-Fructofuranose | $\beta$ -D-Fructofuranose | $\beta$ -D-Fructopyranose |
|------------|-------------------------------------|----------------------------|---------------------------|---------------------------|
| $\Delta G$ | -687.2045314                        | -687.2039814               | -687.206687               | -687.207196               |

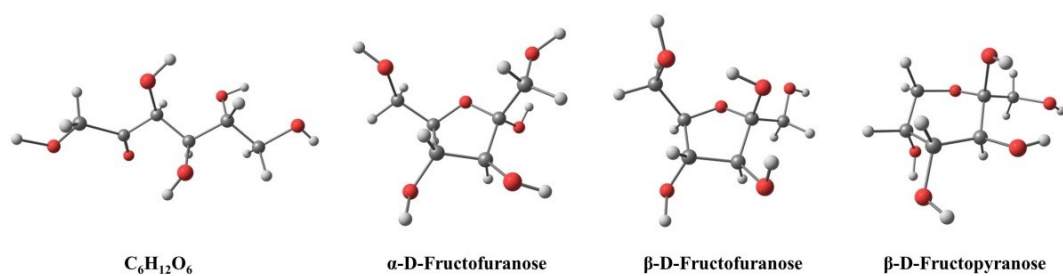

Table S 4 The optimal structures, energy differences ( $\Delta E$ ,  $\Delta H$ ,  $\Delta G$  in kcal/mol) for  $\text{Ca}^{2+} + \alpha$ -D-Fructofuranose,  $\text{Ca}^{2+} + \beta$ -D-Fructofuranose and  $\text{Ca}^{2+} + \beta$ -D-Fructopyranose at the B3LYP/AUG-cc-pVDZ/cc-pVDZ level.

|            | $\text{Ca}^{2+} + \beta$ -D-Fructofuranose | $\text{Ca}^{2+} + \beta$ -D-Fructopyranose | $\text{Ca}^{2+} + \alpha$ -D-Fructofuranose |
|------------|--------------------------------------------|--------------------------------------------|---------------------------------------------|
| $\Delta G$ | 0                                          | 0.6                                        | 2.3                                         |

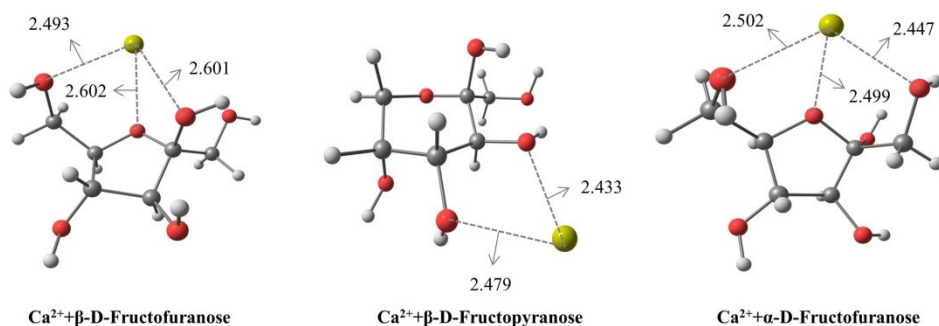

Figure S 8 Optimized structures of the complexes in Table S4. The key bond distances and the average bond length are in Å (color code, C: gray, H: white, O: red, Cl: green, Ca: yellow).

Table S 5 The isomers, energy differences ( $\Delta G$  in hartree) for  $\text{Ca}^{2+} + \beta$ -D-Fructofuranose at the B3LYP/BSI level.

|                                            | 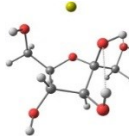 |  |  |  |  |
|--------------------------------------------|-------------------------------------------------------------------------------------|-------------------------------------------------------------------------------------|-------------------------------------------------------------------------------------|---------------------------------------------------------------------------------------|---------------------------------------------------------------------------------------|
| $\text{Ca}^{2+} + \beta$ -D-Fructofuranose | Iso-1                                                                               | Iso-2                                                                               | Iso-3                                                                               | Iso-4                                                                                 | Iso-5                                                                                 |
| $\Delta G$                                 | <b>-1364.751674</b>                                                                 | -1364.748888                                                                        | -1364.746115                                                                        | -1364.747458                                                                          | -1364.748522                                                                          |

Table S 6 The isomers, energy differences ( $\Delta G$  in hartree) for  $\text{Ca}^{2+} + \alpha$ -D-Fructofuranose at the B3LYP/BSI level.

|                                             | 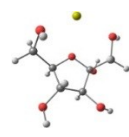 |  |  |  |  |
|---------------------------------------------|-------------------------------------------------------------------------------------|-------------------------------------------------------------------------------------|-------------------------------------------------------------------------------------|--------------------------------------------------------------------------------------|---------------------------------------------------------------------------------------|
| $\text{Ca}^{2+} + \alpha$ -D-Fructofuranose | Iso-1                                                                               | Iso-2                                                                               | Iso-3                                                                               | Iso-4                                                                                | Iso-5                                                                                 |
| $\Delta G$                                  | <b>-1364.748074</b>                                                                 | -1364.744576                                                                        | -1364.745985                                                                        | -1364.744735                                                                         | -1364.747669                                                                          |

Table S7 The isomers, energy differences ( $\Delta G$  in hartree) for  $\text{Ca}^{2+}+\beta\text{-D-Fructopyranose}$  at the B3LYP/BSI level.

|                                                | 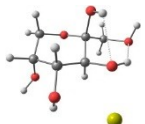 |  |  |  |  |
|------------------------------------------------|-----------------------------------------------------------------------------------|-----------------------------------------------------------------------------------|-----------------------------------------------------------------------------------|------------------------------------------------------------------------------------|-------------------------------------------------------------------------------------|
| $\text{Ca}^{2+}+\beta\text{-D-Fructopyranose}$ | Iso-1                                                                             | Iso-2                                                                             | Iso-3                                                                             | Iso-4                                                                              | Iso-5                                                                               |
| $\Delta G$                                     | -1364.750756                                                                      | -1364.750434                                                                      | -1364.750433                                                                      | -1364.749652                                                                       | -1364.74802                                                                         |

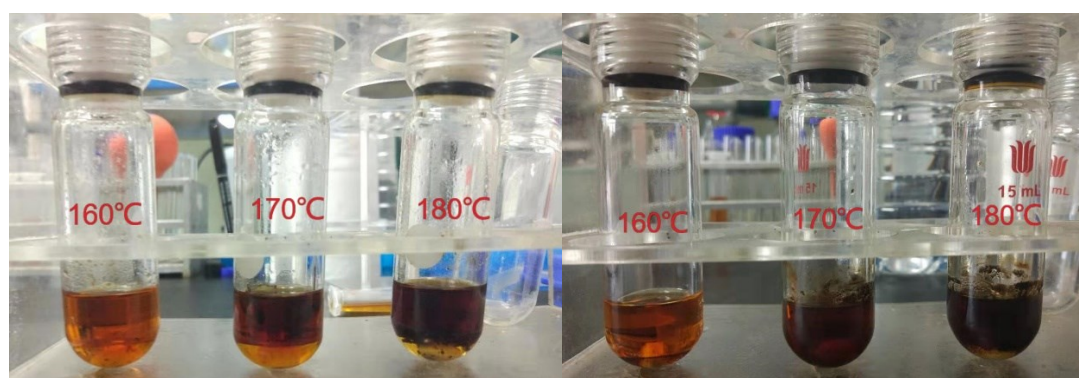

17.9wt%  $\text{CaCl}_2$

25.6wt%  $\text{CaCl}_2$

Figure S 9 The dehydration of glucose into HMF in 17.9 or 25.6wt%  $\text{CaCl}_2$  solution

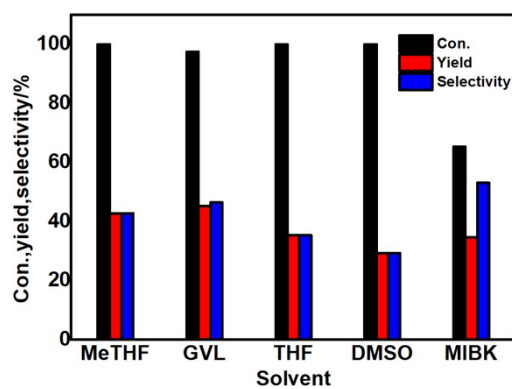

Figure S 10 Effect of solution on the dehydration of glucose to HMF at 180°C for 120 min

Table S8 Effect of reaction temperature and time on the dehydration of glucose to HMF

| Temp.(°C) | CaCl <sub>2</sub> (wt%<br>) | Time(min) | Con. (%) | Yield (%) | Selectivity(%) |
|-----------|-----------------------------|-----------|----------|-----------|----------------|
| 160       | 17.9                        | 120       | 62.40    | 28.30     | 45.35          |
| 170       | 17.9                        | 120       | 72.28    | 39.74     | 54.99          |
| 180       | 17.9                        | 120       | 100.00   | 42.75     | 42.75          |
| 180       | 17.9                        | 10        | 46.59    | 13.12     | 28.16          |
| 180       | 17.9                        | 20        | 79.62    | 34.35     | 43.14          |
| 180       | 17.9                        | 40        | 84.24    | 42.49     | 50.43          |
| 180       | 17.9                        | 60        | 93.59    | 52.06     | 55.62          |
| 180       | 17.9                        | 90        | 100.00   | 45.09     | 45.09          |
| 180       | 17.9                        | 120       | 100.00   | 42.75     | 42.75          |
| 200       | 17.9                        | 50        | 92.70    | 34.97     | 37.72          |
| 200       | 17.9                        | 60        | 100.00   | 44.11     | 44.11          |
| 200       | 17.9                        | 90        | 100.00   | 37.48     | 37.48          |
| 160       | 25.6                        | 120       | 100      | 32.25     | 32.25          |
| 170       | 25.6                        | 120       | 100      | 39.67     | 39.67          |
| 180       | 25.6                        | 120       | 100      | 38.24     | 38.24          |
| 200       | 25.6                        | 30        | 100.00   | 38.21     | 38.21          |
| 200       | 25.6                        | 45        | 100.00   | 46.73     | 46.73          |
| 200       | 25.6                        | 60        | 100.00   | 32.59     | 32.59          |
| 200       | 37.8                        | 15        | 100.00   | 34.49     | 34.49          |
| 200       | 37.8                        | 30        | 100.00   | 30.72     | 30.72          |
| 200       | 37.8                        | 45        | 100.00   | 29.65     | 29.65          |
| 200       | 37.8                        | 60        | 100.00   | 25.14     | 25.14          |

Reaction condition: 100 g·L<sup>-1</sup> glucose, water/MeTHF=1/4.

Table S9 the conversion (C), selectivity (S) and yield (Y) of dehydration of glucose into HMF

| Entry | Catalyst                                                            | Glucose (wt %) | Solvent     | T (°C) | Time/min | C (%) | S (%) | Y (%) | Literature |
|-------|---------------------------------------------------------------------|----------------|-------------|--------|----------|-------|-------|-------|------------|
| 1     | AlCl <sub>3</sub> /HCl<br>Al                                        | 5              | water/MIBK  | 130    | 300      | na    | na    | 43    | 11         |
| 2     | (NO <sub>3</sub> ) <sub>3</sub> /H <sub>2</sub> S<br>O <sub>4</sub> | 2.5            | water/DMSO  | na     | 10       | na    | na    | 29    | 12         |
| 3     | MIL-101(Cr)-<br>SO <sub>3</sub> H                                   | 3              | water/GVL   | 150    | 120      | 98    | 46    | 45    | 13         |
| 4     | Al-KCC-1                                                            | 12.5           | DMSO        | 170    | 120      | 98    | 40    | 39    | 14         |
| 5     | AlCl <sub>3</sub> /HCl/<br>NaCl                                     | 1.8            | water/MIBK  | 160    | na       | 83    | 80    | 66    | 15         |
| 6     | 0.4-Cr/ $\beta$<br>zeolite/NaCl                                     | 10             | water/THF   | 150    | 90       | 87    | 83    | 72    | 16         |
| 7     | AlSiO-<br>20/NaCl                                                   | 10             | water/THF   | 160    | 90       | 92    | 69    | 63    | 17         |
| 8     | SnP-1/NaCl                                                          | 5              | water/THF   | 175    | 60       | 98    | 62    | 61    | 18         |
| 9     | Cr-Beta                                                             | 10             | [BMIM]Cl    | 130    | 60       | na    | na    | 58.8  | 19         |
| 10    | CaCl <sub>2</sub>                                                   | 10             | water/MeTHF | 180    | 90       | 94    | 53    | 50.00 | This work  |

### Purification of HMF

In the fructose or glucose dehydration, organic extractor 2-MeTHF was put into ACE pressure tube. After reaction, the organic phase is concentrated and dried through BUCHI Rotary Steamer, dissolved in 2-3 volumes of diethyl ether, and the upper layer is separated and recrystallized at -40 °C for 24 h in low constant temperature bath to obtain HMF crystals.

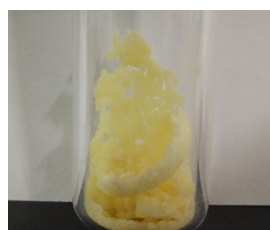

Figure S 11. HMF crystal

Table S10 Coordinates and energies (in hatree) of the calculated structures at the B3LYP/BSI level.

**Glu**

E= -687.3646726

G= -687.2071386

|   |              |              |              |
|---|--------------|--------------|--------------|
| C | -0.755142000 | 0.821993000  | -0.244033000 |
| C | -1.068605000 | -0.602575000 | 0.244319000  |
| C | 1.231215000  | -1.203737000 | 0.293051000  |
| C | 1.669844000  | 0.165743000  | -0.219935000 |
| C | 0.649249000  | 1.229137000  | 0.174064000  |
| H | -1.089096000 | -0.606169000 | 1.346701000  |
| H | -0.818960000 | 0.835634000  | -1.344514000 |
| H | 1.192553000  | -1.217106000 | 1.394123000  |
| H | 1.746517000  | 0.114079000  | -1.316400000 |
| H | 0.669660000  | 1.341796000  | 1.269955000  |
| O | 0.950772000  | 2.487381000  | -0.440065000 |
| H | 1.826887000  | 2.759681000  | -0.133595000 |
| O | -1.674649000 | 1.769822000  | 0.310128000  |
| H | -2.557170000 | 1.360306000  | 0.250487000  |
| O | 2.923063000  | 0.555137000  | 0.347924000  |
| H | 3.611738000  | -0.009045000 | -0.029291000 |
| O | 2.128053000  | -2.169363000 | -0.190162000 |
| H | 2.039208000  | -2.968730000 | 0.347931000  |
| O | -0.065622000 | -1.512740000 | -0.224526000 |
| C | -2.387719000 | -1.137940000 | -0.296649000 |
| H | -2.516734000 | -2.180550000 | 0.026295000  |
| H | -2.376746000 | -1.098360000 | -1.394727000 |
| O | -3.452005000 | -0.318109000 | 0.221613000  |
| H | -4.237814000 | -0.464288000 | -0.321164000 |

**CaCl<sub>2</sub>**

E= -1598.348157

G= -1598.376824

|    |              |              |              |
|----|--------------|--------------|--------------|
| Ca | -0.000000000 | 0.000000000  | 0.481105000  |
| Cl | -0.000000000 | 2.705070000  | -0.283003000 |
| Cl | -0.000000000 | -2.705070000 | -0.283003000 |

**IM1**

E= -2285.72782

G= -2285.575881

|   |             |              |              |
|---|-------------|--------------|--------------|
| C | 2.393201000 | 0.000186000  | 0.437292000  |
| C | 1.980751000 | -1.158763000 | -0.482976000 |
| C | 0.381388000 | 0.197011000  | -1.631097000 |

|    |              |              |              |
|----|--------------|--------------|--------------|
| C  | 0.729018000  | 1.417977000  | -0.783749000 |
| C  | 2.158410000  | 1.329027000  | -0.262760000 |
| H  | 2.632031000  | -1.161728000 | -1.372732000 |
| H  | 1.775624000  | -0.040204000 | 1.349273000  |
| H  | 0.960185000  | 0.173923000  | -2.566371000 |
| H  | 0.036751000  | 1.453674000  | 0.069959000  |
| H  | 2.853881000  | 1.406229000  | -1.114296000 |
| O  | 2.423870000  | 2.383581000  | 0.668610000  |
| H  | 2.241943000  | 3.220449000  | 0.217941000  |
| O  | 3.780602000  | -0.082125000 | 0.780168000  |
| H  | 3.948164000  | -1.010380000 | 1.021983000  |
| O  | 0.629745000  | 2.620584000  | -1.551473000 |
| H  | -0.307050000 | 2.834978000  | -1.656915000 |
| O  | -1.002958000 | 0.240720000  | -1.900364000 |
| H  | -1.200861000 | -0.338427000 | -2.651034000 |
| O  | 0.612791000  | -0.998314000 | -0.886625000 |
| C  | 2.034138000  | -2.520843000 | 0.205091000  |
| H  | 1.676604000  | -3.292553000 | -0.489792000 |
| H  | 1.385403000  | -2.508785000 | 1.089157000  |
| O  | 3.353384000  | -2.836231000 | 0.677295000  |
| H  | 3.911888000  | -3.024018000 | -0.090844000 |
| Ca | -2.264907000 | -0.490164000 | 0.190685000  |
| Cl | -4.973029000 | -0.871378000 | -0.198857000 |
| Cl | -1.559755000 | 1.217074000  | 2.268757000  |

## IM2

E= -2286.147398

G= -2285.986063

|   |              |              |              |
|---|--------------|--------------|--------------|
| C | -2.701713000 | 0.059821000  | -0.421788000 |
| C | -2.092787000 | -0.818666000 | 0.679397000  |
| C | -0.348170000 | 0.923280000  | 1.135049000  |
| C | -0.869061000 | 1.764714000  | -0.022361000 |
| C | -2.369572000 | 1.533547000  | -0.218150000 |
| H | -2.517202000 | -0.566201000 | 1.656834000  |
| H | -2.299747000 | -0.262230000 | -1.395828000 |
| H | -0.892753000 | 1.093722000  | 2.067781000  |
| H | -0.322888000 | 1.494518000  | -0.937631000 |
| H | -2.893304000 | 1.890796000  | 0.682561000  |
| O | -2.837277000 | 2.239314000  | -1.365571000 |
| H | -2.691509000 | 3.183102000  | -1.210175000 |
| O | -4.121053000 | -0.076401000 | -0.403221000 |
| H | -4.314084000 | -1.030157000 | -0.364172000 |
| O | -0.694102000 | 3.142903000  | 0.283007000  |
| H | 0.238293000  | 3.368404000  | 0.158805000  |

|    |              |              |              |
|----|--------------|--------------|--------------|
| O  | 1.015703000  | 1.046151000  | 1.280272000  |
| H  | 1.253337000  | 0.891826000  | 2.208305000  |
| O  | -0.643007000 | -0.525759000 | 0.810858000  |
| C  | -2.199520000 | -2.321184000 | 0.412221000  |
| H  | -1.658657000 | -2.869931000 | 1.193743000  |
| H  | -1.766538000 | -2.562031000 | -0.564918000 |
| O  | -3.572837000 | -2.716919000 | 0.355252000  |
| H  | -3.932600000 | -2.700756000 | 1.254486000  |
| Ca | 3.053403000  | -0.618514000 | 0.387244000  |
| Cl | 5.591265000  | 0.178611000  | -0.322736000 |
| Cl | 0.945086000  | -1.381039000 | -1.414339000 |
| H  | -0.082839000 | -0.842887000 | -0.035372000 |

### TS1

E= -2286.109989

G= -2285.949604

|    |              |              |              |
|----|--------------|--------------|--------------|
| C  | -2.536064000 | -0.171709000 | -0.406931000 |
| C  | -2.408752000 | -1.229646000 | 0.701856000  |
| C  | -0.256399000 | 1.831942000  | 0.233241000  |
| C  | -1.616737000 | 2.193448000  | -0.252878000 |
| C  | -2.719028000 | 1.240416000  | 0.217987000  |
| H  | -3.294681000 | -1.178227000 | 1.350970000  |
| H  | -1.585283000 | -0.190214000 | -0.969149000 |
| H  | -0.079748000 | 1.611756000  | 1.290007000  |
| H  | -1.631589000 | 2.314769000  | -1.341648000 |
| H  | -2.648231000 | 1.165371000  | 1.311450000  |
| O  | -3.979980000 | 1.788349000  | -0.138030000 |
| H  | -4.105147000 | 2.589045000  | 0.390575000  |
| O  | -3.607104000 | -0.448556000 | -1.305881000 |
| H  | -3.698560000 | -1.420340000 | -1.341382000 |
| O  | -1.769834000 | 3.447325000  | 0.429765000  |
| H  | -1.362574000 | 4.144928000  | -0.107328000 |
| O  | 0.724528000  | 1.922409000  | -0.559609000 |
| H  | 1.591932000  | 1.796059000  | -0.117621000 |
| O  | -1.282115000 | -0.907481000 | 1.523648000  |
| C  | -2.262068000 | -2.654743000 | 0.161077000  |
| H  | -2.063484000 | -3.337619000 | 0.998020000  |
| H  | -1.424800000 | -2.706969000 | -0.544861000 |
| O  | -3.425902000 | -3.082226000 | -0.573925000 |
| H  | -4.159464000 | -3.176153000 | 0.051248000  |
| Ca | 3.675671000  | -0.164177000 | 0.402607000  |
| Cl | 6.254786000  | 0.110570000  | -0.477332000 |
| Cl | 1.329092000  | -1.654405000 | -0.050620000 |
| H  | -0.460175000 | -1.100487000 | 1.018912000  |



### IM3

E= -2286.11983

G= -2285.959774

|    |              |              |              |
|----|--------------|--------------|--------------|
| C  | 2.469349000  | 0.246145000  | 0.346325000  |
| C  | 2.348185000  | -0.759074000 | -0.823907000 |
| C  | -0.693531000 | 2.377567000  | -0.299555000 |
| C  | 0.150602000  | 1.295151000  | 0.206277000  |
| C  | 1.677137000  | 1.545228000  | 0.146290000  |
| H  | 2.753231000  | -0.281057000 | -1.725549000 |
| H  | 2.128742000  | -0.242067000 | 1.273860000  |
| H  | -1.714293000 | 2.504752000  | 0.077061000  |
| H  | -0.040117000 | 0.515212000  | -0.572335000 |
| H  | 1.922224000  | 1.959013000  | -0.841605000 |
| O  | 2.058486000  | 2.452993000  | 1.176972000  |
| H  | 1.827985000  | 3.349774000  | 0.898190000  |
| O  | 3.842763000  | 0.635636000  | 0.481302000  |
| H  | 4.377888000  | -0.165992000 | 0.321420000  |
| O  | -0.317861000 | 0.883242000  | 1.471391000  |
| H  | -0.471779000 | -0.088246000 | 1.448481000  |
| O  | -0.273436000 | 3.137413000  | -1.223514000 |
| H  | -0.954339000 | 3.768608000  | -1.535188000 |
| O  | 0.997623000  | -1.112169000 | -1.140536000 |
| C  | 3.113033000  | -2.055947000 | -0.545663000 |
| H  | 2.907045000  | -2.763553000 | -1.360481000 |
| H  | 2.765115000  | -2.489142000 | 0.403452000  |
| O  | 4.527346000  | -1.782240000 | -0.476156000 |
| H  | 4.956732000  | -2.516451000 | -0.017105000 |
| Ca | -2.743258000 | -0.543659000 | -0.737237000 |
| Cl | -5.318613000 | -0.263644000 | 0.140069000  |
| Cl | -0.989954000 | -2.131160000 | 1.051867000  |
| H  | 0.584343000  | -1.579421000 | -0.382648000 |

### TS2

E= -2286.110229

G= -2285.952292

|   |              |              |              |
|---|--------------|--------------|--------------|
| C | 2.466512000  | 0.170617000  | 0.533631000  |
| C | 2.272118000  | -0.626703000 | -0.771610000 |
| C | -0.380186000 | 2.194270000  | -0.735170000 |
| C | 0.255136000  | 1.382981000  | 0.194408000  |
| C | 1.758292000  | 1.524574000  | 0.477091000  |
| H | 2.674817000  | -0.052621000 | -1.613548000 |
| H | 2.059652000  | -0.418217000 | 1.372371000  |

|    |              |              |              |
|----|--------------|--------------|--------------|
| H  | -1.471496000 | 2.232877000  | -0.771778000 |
| H  | 0.335232000  | 0.354876000  | -0.676480000 |
| H  | 2.203303000  | 2.102579000  | -0.344406000 |
| O  | 1.977686000  | 2.181235000  | 1.722834000  |
| H  | 1.681167000  | 3.098257000  | 1.636485000  |
| O  | 3.855376000  | 0.429201000  | 0.737721000  |
| H  | 4.337343000  | -0.377693000 | 0.475196000  |
| O  | -0.559546000 | 0.973586000  | 1.261859000  |
| H  | -0.520678000 | -0.001714000 | 1.355452000  |
| O  | 0.291875000  | 2.859303000  | -1.648350000 |
| H  | -0.312161000 | 3.269772000  | -2.289673000 |
| O  | 0.848345000  | -0.781220000 | -1.064773000 |
| C  | 2.893359000  | -2.017441000 | -0.736415000 |
| H  | 2.611933000  | -2.560321000 | -1.649291000 |
| H  | 2.523033000  | -2.566079000 | 0.141070000  |
| O  | 4.320478000  | -1.858903000 | -0.663488000 |
| H  | 4.704970000  | -2.698699000 | -0.377761000 |
| Ca | -2.765414000 | -0.409406000 | -0.654237000 |
| Cl | -5.334947000 | -0.132905000 | 0.220752000  |
| Cl | -0.982716000 | -2.159234000 | 0.939349000  |
| H  | 0.416340000  | -1.423940000 | -0.432647000 |

#### IM4

E= -2286.128911

G= -2285.97058

|   |              |              |              |
|---|--------------|--------------|--------------|
| C | -2.016469000 | 0.202243000  | -0.783194000 |
| C | -2.239260000 | -0.474868000 | 0.579674000  |
| C | 0.123559000  | 2.217366000  | 1.258257000  |
| C | -0.092693000 | 1.686049000  | 0.041855000  |
| C | -1.413145000 | 1.613154000  | -0.681518000 |
| H | -2.768208000 | 0.187917000  | 1.271075000  |
| H | -1.343375000 | -0.432661000 | -1.381582000 |
| H | 1.125226000  | 2.270007000  | 1.683560000  |
| H | -0.429497000 | 0.095719000  | 1.308268000  |
| H | -2.137896000 | 2.257830000  | -0.169072000 |
| O | -1.217563000 | 2.046114000  | -2.038245000 |
| H | -1.065721000 | 3.001960000  | -2.027491000 |
| O | -3.272042000 | 0.349296000  | -1.446328000 |
| H | -3.855998000 | -0.381830000 | -1.166419000 |
| O | 1.004300000  | 1.163234000  | -0.639950000 |
| H | 0.796700000  | 1.157038000  | -1.588665000 |
| O | -0.910156000 | 2.714810000  | 2.016196000  |
| H | -0.545567000 | 3.082520000  | 2.832745000  |
| O | -0.941999000 | -0.753217000 | 1.244087000  |

|    |              |              |              |
|----|--------------|--------------|--------------|
| C  | -2.927727000 | -1.834730000 | 0.500841000  |
| H  | -2.857442000 | -2.324029000 | 1.481445000  |
| H  | -2.436906000 | -2.462555000 | -0.255163000 |
| O  | -4.296337000 | -1.596894000 | 0.145859000  |
| H  | -4.680630000 | -2.434549000 | -0.147138000 |
| Ca | 2.536463000  | -0.460904000 | 0.523077000  |
| Cl | 5.020984000  | -0.087096000 | -0.560912000 |
| Cl | 0.760148000  | -2.571942000 | -0.189600000 |
| H  | -0.344397000 | -1.437689000 | 0.707153000  |

### TS3

E= -2286.109554

G= -2285.954826

|    |              |              |              |
|----|--------------|--------------|--------------|
| C  | 2.140072000  | 0.161214000  | 0.692009000  |
| C  | 2.153505000  | -0.574756000 | -0.665723000 |
| C  | 0.057650000  | 1.711756000  | -1.362988000 |
| C  | 0.243083000  | 1.744670000  | 0.009130000  |
| C  | 1.603175000  | 1.613808000  | 0.674193000  |
| H  | 2.626895000  | 0.043253000  | -1.434843000 |
| H  | 1.497787000  | -0.411610000 | 1.380829000  |
| H  | -0.947578000 | 1.870572000  | -1.761729000 |
| H  | 0.237593000  | 0.351959000  | -1.209794000 |
| H  | 2.323567000  | 2.250231000  | 0.148004000  |
| O  | 1.470590000  | 1.993112000  | 2.041652000  |
| H  | 1.524248000  | 2.958039000  | 2.103683000  |
| O  | 3.459431000  | 0.257981000  | 1.222981000  |
| H  | 3.992964000  | -0.470999000 | 0.846893000  |
| O  | -0.807634000 | 1.734012000  | 0.801858000  |
| H  | -0.486059000 | 1.655719000  | 1.725970000  |
| O  | 1.131307000  | 2.110210000  | -2.169305000 |
| H  | 1.108789000  | 1.593160000  | -2.987451000 |
| O  | 0.797164000  | -0.820015000 | -1.138063000 |
| C  | 2.842579000  | -1.936660000 | -0.602217000 |
| H  | 2.653505000  | -2.464949000 | -1.546064000 |
| H  | 2.435500000  | -2.526656000 | 0.230817000  |
| O  | 4.252400000  | -1.718170000 | -0.420108000 |
| H  | 4.654705000  | -2.552190000 | -0.141052000 |
| Ca | -2.666225000 | -0.378383000 | -0.609980000 |
| Cl | -5.241209000 | -0.093548000 | 0.262062000  |
| Cl | -0.949152000 | -2.151927000 | 0.921072000  |
| H  | 0.272263000  | -1.333027000 | -0.447487000 |

### IM5

E= -2286.141263

G= -2285.980909

|    |              |              |              |
|----|--------------|--------------|--------------|
| C  | -2.680430000 | 0.194322000  | -0.043416000 |
| C  | -1.487288000 | 0.959230000  | -0.611440000 |
| C  | -0.174809000 | -1.990500000 | -1.222916000 |
| C  | -0.976426000 | -1.693343000 | -0.009080000 |
| C  | -2.449323000 | -1.328749000 | -0.106858000 |
| H  | -1.402284000 | 0.788012000  | -1.690720000 |
| H  | -2.762463000 | 0.442187000  | 1.028304000  |
| H  | -0.429239000 | -1.291933000 | -2.028954000 |
| H  | -2.820020000 | -1.709226000 | -1.067649000 |
| O  | -3.134673000 | -1.908991000 | 0.992784000  |
| H  | -3.312938000 | -2.841745000 | 0.796726000  |
| O  | -3.893815000 | 0.484780000  | -0.720286000 |
| H  | -3.923391000 | 1.454405000  | -0.818155000 |
| O  | -0.537529000 | -2.141722000 | 1.108931000  |
| H  | -1.254446000 | -2.089789000 | 1.784897000  |
| O  | 1.207928000  | -1.989145000 | -0.907691000 |
| H  | 1.686755000  | -2.405376000 | -1.638630000 |
| O  | -0.318569000 | 0.381068000  | -0.012966000 |
| C  | -1.538097000 | 2.453714000  | -0.319707000 |
| H  | -0.627358000 | 2.933168000  | -0.704652000 |
| H  | -1.600605000 | 2.613001000  | 0.766427000  |
| O  | -2.705627000 | 2.978162000  | -0.972295000 |
| H  | -2.897468000 | 3.848283000  | -0.597600000 |
| Ca | 2.210581000  | 0.266432000  | -0.304725000 |
| Cl | 4.968679000  | 0.261182000  | -0.674253000 |
| Cl | 1.310598000  | 0.990338000  | 2.370195000  |
| H  | -0.203122000 | 0.649112000  | 0.937007000  |
| H  | -0.516220000 | -2.995840000 | -1.530840000 |

#### TS4

E= -2286.141114

G= -2285.979342

|   |              |              |              |
|---|--------------|--------------|--------------|
| C | -2.700096000 | 0.186548000  | -0.032261000 |
| C | -1.508715000 | 0.936908000  | -0.621522000 |
| C | -0.195019000 | -1.996594000 | -1.230922000 |
| C | -0.952970000 | -1.653401000 | 0.002814000  |
| C | -2.442873000 | -1.330692000 | -0.064110000 |
| H | -1.441926000 | 0.759596000  | -1.701014000 |
| H | -2.782244000 | 0.460332000  | 1.032850000  |
| H | -0.481484000 | -1.328568000 | -2.051820000 |
| H | -2.829580000 | -1.744683000 | -1.004436000 |
| O | -3.085675000 | -1.901598000 | 1.065539000  |

|    |              |              |              |
|----|--------------|--------------|--------------|
| H  | -3.247381000 | -2.841813000 | 0.893537000  |
| O  | -3.915366000 | 0.453589000  | -0.715024000 |
| H  | -3.966290000 | 1.421766000  | -0.808719000 |
| O  | -0.484184000 | -2.103867000 | 1.114960000  |
| H  | -1.181640000 | -2.045660000 | 1.808552000  |
| O  | 1.200246000  | -1.973639000 | -0.966995000 |
| H  | 1.656671000  | -2.392077000 | -1.710871000 |
| O  | -0.342992000 | 0.334625000  | -0.035872000 |
| C  | -1.530043000 | 2.432078000  | -0.335350000 |
| H  | -0.620417000 | 2.897913000  | -0.739407000 |
| H  | -1.572375000 | 2.599295000  | 0.750277000  |
| O  | -2.702737000 | 2.962983000  | -0.972369000 |
| H  | -2.875190000 | 3.841050000  | -0.607036000 |
| Ca | 2.228613000  | 0.265870000  | -0.364339000 |
| Cl | 5.000607000  | 0.263312000  | -0.568344000 |
| Cl | 1.241554000  | 1.020325000  | 2.319421000  |
| H  | -0.186581000 | 0.623442000  | 0.909187000  |
| H  | -0.536586000 | -3.015643000 | -1.486435000 |

## IM6

E= -2286.146035

G= -2285.987831

|   |              |              |              |
|---|--------------|--------------|--------------|
| C | -2.907782000 | -0.067276000 | -0.059607000 |
| C | -1.792640000 | 0.735621000  | -0.724535000 |
| C | -0.092791000 | -2.033174000 | -0.984533000 |
| C | -0.786878000 | -1.327869000 | 0.157485000  |
| C | -2.340123000 | -1.473367000 | 0.118219000  |
| H | -1.725729000 | 0.494950000  | -1.791145000 |
| H | -3.104046000 | 0.352980000  | 0.938731000  |
| H | -0.468988000 | -1.634339000 | -1.935649000 |
| H | -2.617855000 | -2.096158000 | -0.740370000 |
| O | -2.827173000 | -2.027390000 | 1.329197000  |
| H | -2.745517000 | -2.991498000 | 1.287328000  |
| O | -4.096006000 | -0.112135000 | -0.833634000 |
| H | -4.392818000 | 0.803168000  | -0.955611000 |
| O | -0.219339000 | -1.623448000 | 1.358651000  |
| H | -0.916922000 | -1.592536000 | 2.039822000  |
| O | 1.322007000  | -1.861792000 | -0.875554000 |
| H | 1.743501000  | -2.358888000 | -1.590258000 |
| O | -0.575692000 | 0.192965000  | -0.109054000 |
| C | -1.857065000 | 2.236556000  | -0.512089000 |
| H | -0.963673000 | 2.720520000  | -0.930607000 |
| H | -1.926050000 | 2.463698000  | 0.559705000  |
| O | -3.043447000 | 2.657898000  | -1.197433000 |

|    |              |              |              |
|----|--------------|--------------|--------------|
| H  | -3.219114000 | 3.575453000  | -0.949760000 |
| Ca | 2.579287000  | 0.188800000  | -0.261053000 |
| Cl | 5.347949000  | 0.181543000  | -0.439240000 |
| Cl | 0.738946000  | 1.736719000  | 1.858219000  |
| H  | -0.188312000 | 0.741704000  | 0.730195000  |
| H  | -0.356554000 | -3.097236000 | -0.910988000 |

**TS1-0**

E= -687.2942247

G= -687.1428777

|   |              |              |              |
|---|--------------|--------------|--------------|
| C | -0.637714000 | 0.833044000  | -0.212613000 |
| C | -1.161383000 | -0.451114000 | 0.441775000  |
| C | 1.379481000  | -1.341244000 | 0.335659000  |
| C | 1.723277000  | 0.040111000  | -0.225660000 |
| C | 0.779423000  | 1.140508000  | 0.248792000  |
| H | -1.364629000 | -0.246984000 | 1.500339000  |
| H | -0.637968000 | 0.718025000  | -1.308205000 |
| H | 1.752043000  | -1.475878000 | 1.361277000  |
| H | 1.675522000  | -0.015544000 | -1.321785000 |
| H | 0.803741000  | 1.206926000  | 1.349000000  |
| O | 1.167560000  | 2.394382000  | -0.318156000 |
| H | 2.113684000  | 2.502382000  | -0.142259000 |
| O | -1.482412000 | 1.923184000  | 0.162795000  |
| H | -2.391893000 | 1.645017000  | -0.040059000 |
| O | 3.045382000  | 0.397738000  | 0.190655000  |
| H | 3.678708000  | -0.066991000 | -0.373197000 |
| O | 1.526992000  | -2.395185000 | -0.514814000 |
| H | 0.166023000  | -2.226496000 | -0.433685000 |
| O | -0.172080000 | -1.522141000 | 0.421340000  |
| C | -2.405837000 | -1.013188000 | -0.243926000 |
| H | -2.706805000 | -1.949564000 | 0.243759000  |
| H | -2.180916000 | -1.211734000 | -1.298618000 |
| O | -3.475818000 | -0.059137000 | -0.225426000 |
| H | -3.847997000 | -0.038595000 | 0.668120000  |

**IM1-1**

E= -2285.71673

G= -2285.566487

|   |              |              |              |
|---|--------------|--------------|--------------|
| C | -2.769673000 | 0.460905000  | -0.430644000 |
| C | -2.400318000 | -0.666513000 | 0.551031000  |
| C | -0.199146000 | 0.362615000  | 0.537758000  |
| C | -0.745630000 | 1.767782000  | 0.217021000  |
| C | -2.273398000 | 1.784075000  | 0.124033000  |

|    |              |              |              |
|----|--------------|--------------|--------------|
| H  | -3.160869000 | -0.663735000 | 1.343948000  |
| H  | -2.309040000 | 0.278439000  | -1.412594000 |
| H  | 0.641016000  | 0.443074000  | 1.241231000  |
| H  | -0.331947000 | 2.078535000  | -0.750938000 |
| H  | -2.681907000 | 1.916760000  | 1.137671000  |
| O  | -2.736620000 | 2.845311000  | -0.718337000 |
| H  | -2.475669000 | 3.681671000  | -0.308589000 |
| O  | -4.193033000 | 0.520438000  | -0.586065000 |
| H  | -4.469235000 | -0.372329000 | -0.849676000 |
| O  | -0.382146000 | 2.714800000  | 1.229346000  |
| H  | 0.570565000  | 2.869990000  | 1.167086000  |
| O  | 0.207448000  | -0.232369000 | -0.676308000 |
| H  | 0.560892000  | -1.127575000 | -0.462916000 |
| O  | -1.147352000 | -0.437569000 | 1.231900000  |
| C  | -2.390898000 | -2.042801000 | -0.114996000 |
| H  | -2.068726000 | -2.801677000 | 0.610810000  |
| H  | -1.705571000 | -2.052101000 | -0.968334000 |
| O  | -3.693376000 | -2.360546000 | -0.641034000 |
| H  | -4.283781000 | -2.532323000 | 0.106672000  |
| Ca | 3.404284000  | -0.611813000 | 0.141529000  |
| Cl | 5.098375000  | 1.451690000  | -0.587066000 |
| Cl | 1.599484000  | -2.856358000 | 0.133761000  |

### TS1-1

E= -2285.630624

G= -2285.486333

|   |              |              |              |
|---|--------------|--------------|--------------|
| C | -3.248835000 | -0.047486000 | -0.363843000 |
| C | -3.608957000 | -1.110254000 | 0.698163000  |
| C | -0.512574000 | 1.079150000  | 0.104909000  |
| C | -1.675733000 | 1.958467000  | -0.216109000 |
| C | -2.973092000 | 1.315798000  | 0.311955000  |
| H | -4.539696000 | -0.763372000 | 1.208406000  |
| H | -2.314033000 | -0.408991000 | -0.825395000 |
| H | -0.254932000 | 0.900425000  | 1.156120000  |
| H | -1.739903000 | 2.134581000  | -1.297175000 |
| H | -2.830528000 | 1.141265000  | 1.386280000  |
| O | -4.059579000 | 2.211892000  | 0.110327000  |
| H | -3.924233000 | 2.964727000  | 0.702330000  |
| O | -4.226461000 | 0.119263000  | -1.400646000 |
| H | -4.662648000 | -0.749174000 | -1.497071000 |
| O | -1.453577000 | 3.168722000  | 0.509363000  |
| H | -0.809582000 | 3.707463000  | 0.026771000  |
| O | 0.210086000  | 0.597141000  | -0.798089000 |
| H | 0.997629000  | -0.003550000 | -0.405966000 |

|    |              |              |              |
|----|--------------|--------------|--------------|
| O  | -2.536685000 | -1.262762000 | 1.581083000  |
| C  | -3.931770000 | -2.458448000 | 0.035288000  |
| H  | -4.091958000 | -3.212193000 | 0.819391000  |
| H  | -3.086216000 | -2.774724000 | -0.590357000 |
| O  | -5.081589000 | -2.424560000 | -0.852523000 |
| H  | -5.863897000 | -2.241094000 | -0.312684000 |
| Ca | 4.999675000  | -0.283381000 | 0.328284000  |
| Cl | 7.577352000  | -0.006359000 | -0.547074000 |
| Cl | 2.188218000  | -1.095327000 | 0.337978000  |

### IM1-2

E= -1147.778758

G= -1147.625507

|    |              |              |              |
|----|--------------|--------------|--------------|
| C  | -1.902549000 | 0.088840000  | -0.102464000 |
| C  | -0.888566000 | -1.058403000 | 0.041264000  |
| C  | 0.969838000  | 0.417090000  | -0.162994000 |
| C  | 0.059638000  | 1.629463000  | -0.349001000 |
| C  | -1.280778000 | 1.403842000  | 0.340724000  |
| H  | -0.653619000 | -1.195209000 | 1.110761000  |
| H  | -2.190120000 | 0.169254000  | -1.163704000 |
| H  | 1.185973000  | 0.253594000  | 0.905935000  |
| H  | -0.099619000 | 1.777022000  | -1.428112000 |
| H  | -1.111365000 | 1.362974000  | 1.428746000  |
| O  | -2.203628000 | 2.459280000  | 0.041543000  |
| H  | -1.809617000 | 3.287893000  | 0.347995000  |
| O  | -3.065958000 | -0.146487000 | 0.700608000  |
| H  | -3.303117000 | -1.082367000 | 0.570507000  |
| O  | 0.639606000  | 2.802477000  | 0.230284000  |
| H  | 1.453293000  | 3.000326000  | -0.254292000 |
| O  | 2.146780000  | 0.607845000  | -0.888255000 |
| H  | 2.867726000  | 0.070068000  | -0.460586000 |
| O  | 0.308382000  | -0.748031000 | -0.680926000 |
| C  | -1.396436000 | -2.374409000 | -0.544010000 |
| H  | -0.603465000 | -3.131463000 | -0.479110000 |
| H  | -1.667462000 | -2.230409000 | -1.596778000 |
| O  | -2.587641000 | -2.832265000 | 0.119033000  |
| H  | -2.340946000 | -3.133966000 | 1.005350000  |
| Cl | 4.294419000  | -0.995813000 | 0.499640000  |

### TS1-2

E= -1147.693085

G=-1147.549181

|   |              |             |              |
|---|--------------|-------------|--------------|
| C | -1.333936000 | 0.078020000 | -0.297779000 |
|---|--------------|-------------|--------------|



|    |              |              |              |
|----|--------------|--------------|--------------|
| C  | -1.614392000 | -1.004802000 | 0.767665000  |
| C  | 1.601183000  | 0.824273000  | -0.038342000 |
| C  | 0.509749000  | 1.840699000  | -0.266355000 |
| C  | -0.809036000 | 1.373841000  | 0.368653000  |
| H  | -2.423728000 | -0.606817000 | 1.427633000  |
| H  | -0.539823000 | -0.333203000 | -0.942906000 |
| H  | 1.948812000  | 0.706553000  | 1.002885000  |
| H  | 0.373920000  | 2.010746000  | -1.342845000 |
| H  | -0.607111000 | 1.161282000  | 1.427136000  |
| O  | -1.776825000 | 2.419542000  | 0.273202000  |
| H  | -1.413288000 | 3.177733000  | 0.751941000  |
| O  | -2.468263000 | 0.388507000  | -1.125331000 |
| H  | -2.979116000 | -0.440368000 | -1.195865000 |
| O  | 0.911387000  | 3.041700000  | 0.402270000  |
| H  | 1.587274000  | 3.478933000  | -0.134658000 |
| O  | 2.134479000  | 0.193152000  | -0.949242000 |
| H  | 3.225663000  | -0.731824000 | -0.480854000 |
| O  | -0.442793000 | -1.297690000 | 1.469598000  |
| C  | -2.155180000 | -2.287369000 | 0.115806000  |
| H  | -2.255415000 | -3.063460000 | 0.888075000  |
| H  | -1.449087000 | -2.639484000 | -0.648311000 |
| O  | -3.423505000 | -2.120789000 | -0.574518000 |
| H  | -4.092970000 | -1.907179000 | 0.091092000  |
| Cl | 4.232864000  | -1.573897000 | -0.041709000 |

**TS1-a**

E= -1808.506652

G= -1808.343000

|   |              |              |              |
|---|--------------|--------------|--------------|
| C | -2.099110000 | -0.295727000 | -0.410212000 |
| C | -1.846366000 | -1.308501000 | 0.712372000  |
| C | -0.262042000 | 2.010694000  | 0.350759000  |
| C | -1.628373000 | 2.199864000  | -0.214475000 |
| C | -2.580675000 | 1.065403000  | 0.186392000  |
| H | -2.731921000 | -1.360383000 | 1.361217000  |
| H | -1.144354000 | -0.151984000 | -0.940255000 |
| H | -0.113433000 | 1.929592000  | 1.431360000  |
| H | -1.585859000 | 2.305976000  | -1.304995000 |
| H | -2.587384000 | 1.011054000  | 1.282830000  |
| O | -3.888983000 | 1.393103000  | -0.246596000 |
| H | -4.119716000 | 0.708696000  | -0.904010000 |
| O | -3.068242000 | -0.738459000 | -1.364140000 |
| H | -3.200077000 | -1.699318000 | -1.233297000 |
| O | -2.040062000 | 3.408692000  | 0.427824000  |
| H | -1.650231000 | 4.158579000  | -0.047085000 |

|    |              |              |              |
|----|--------------|--------------|--------------|
| O  | 0.742283000  | 2.058782000  | -0.414858000 |
| H  | 1.600185000  | 2.013546000  | 0.061803000  |
| O  | -0.780845000 | -0.812270000 | 1.530124000  |
| C  | -1.535766000 | -2.713403000 | 0.192850000  |
| H  | -1.204782000 | -3.347653000 | 1.025616000  |
| H  | -0.745879000 | -2.681175000 | -0.567105000 |
| O  | -2.688523000 | -3.286955000 | -0.456073000 |
| H  | -3.348990000 | -3.483706000 | 0.224500000  |
| Cl | 5.671704000  | 0.275075000  | -0.567738000 |
| Cl | 1.974507000  | -1.471704000 | 0.045956000  |
| H  | 0.062161000  | -0.922684000 | 1.047846000  |
| Mg | 3.691139000  | -0.005913000 | 0.559626000  |

### TS1-b

E= -9185.473494

G= -9185.294466

|    |              |              |              |
|----|--------------|--------------|--------------|
| C  | 2.326781000  | 0.675127000  | -0.574404000 |
| C  | 1.926055000  | 1.390950000  | 0.726030000  |
| C  | 1.945313000  | -2.309226000 | 0.447706000  |
| C  | 3.108503000  | -1.879075000 | -0.337940000 |
| C  | 3.385438000  | -0.349339000 | -0.102542000 |
| H  | 2.882942000  | 1.860549000  | 1.002416000  |
| H  | 1.553736000  | 0.268288000  | -1.228465000 |
| H  | 2.076929000  | -2.666340000 | 1.475243000  |
| H  | 2.953160000  | -2.061296000 | -1.409809000 |
| H  | 3.504906000  | -0.263602000 | 0.982558000  |
| O  | 4.641162000  | -0.129174000 | -0.737078000 |
| H  | 5.255883000  | -0.762424000 | -0.338372000 |
| O  | 3.037234000  | 1.634318000  | -1.388559000 |
| H  | 2.485266000  | 2.434428000  | -1.378724000 |
| O  | 4.273734000  | -2.535433000 | 0.150135000  |
| H  | 4.274780000  | -3.444436000 | -0.183828000 |
| O  | 0.784730000  | -2.211869000 | -0.034516000 |
| H  | 0.078712000  | -2.435102000 | 0.613628000  |
| O  | 1.639643000  | 0.503451000  | 1.827776000  |
| C  | 0.934842000  | 2.565221000  | 0.690487000  |
| H  | 0.920825000  | 2.961219000  | 1.717816000  |
| H  | -0.050021000 | 2.221161000  | 0.403210000  |
| O  | 1.300394000  | 3.589878000  | -0.246515000 |
| H  | 2.061697000  | 4.077196000  | 0.100277000  |
| Cl | -5.084410000 | -0.591579000 | -0.335685000 |
| Cl | -0.407089000 | 0.238877000  | 0.149407000  |
| H  | 0.687321000  | 0.304079000  | 1.829580000  |
| Ba | -2.544775000 | -0.069091000 | -0.037228000 |

**TS1-c**

E= -6513.964365

G= -6513.80533

|    |              |              |              |
|----|--------------|--------------|--------------|
| C  | 3.254258000  | -0.540209000 | 0.128143000  |
| C  | 2.195168000  | -1.200550000 | -0.761397000 |
| C  | 2.166584000  | 2.239724000  | 0.564491000  |
| C  | 3.610872000  | 1.998571000  | 0.298837000  |
| C  | 3.804796000  | 0.741769000  | -0.576314000 |
| H  | 2.605451000  | -1.332334000 | -1.773096000 |
| H  | 2.762275000  | -0.273856000 | 1.075469000  |
| H  | 1.490926000  | 2.531871000  | -0.244870000 |
| H  | 4.156427000  | 1.885147000  | 1.244291000  |
| H  | 3.261560000  | 0.916333000  | -1.513834000 |
| O  | 5.180009000  | 0.614462000  | -0.884089000 |
| H  | 5.463164000  | -0.212264000 | -0.446608000 |
| O  | 4.359110000  | -1.395849000 | 0.432975000  |
| H  | 4.098124000  | -2.310290000 | 0.200396000  |
| O  | 4.042251000  | 3.135625000  | -0.442174000 |
| H  | 4.171623000  | 3.874254000  | 0.171451000  |
| O  | 1.734804000  | 2.180803000  | 1.749788000  |
| H  | 0.779297000  | 2.390338000  | 1.827469000  |
| O  | 1.099110000  | -0.283538000 | -0.876337000 |
| C  | 1.736508000  | -2.562948000 | -0.242288000 |
| H  | 0.879684000  | -2.915861000 | -0.830362000 |
| H  | 1.440102000  | -2.500205000 | 0.811142000  |
| O  | 2.817250000  | -3.516877000 | -0.299135000 |
| H  | 2.990751000  | -3.719032000 | -1.230385000 |
| H  | 0.452845000  | -0.459374000 | -0.156625000 |
| Br | -5.301128000 | 0.472534000  | -0.151830000 |
| Br | -1.453132000 | -0.961508000 | 1.068656000  |
| Ca | -2.631127000 | 0.465209000  | -1.257020000 |

**TS1-d**

E= -4713.596122

G= -4713.437386

|   |              |              |              |
|---|--------------|--------------|--------------|
| C | -2.996958000 | -0.145715000 | -0.449577000 |
| C | -2.888059000 | -1.215252000 | 0.650139000  |
| C | -0.724067000 | 1.823396000  | 0.248645000  |
| C | -2.074656000 | 2.215180000  | -0.240209000 |
| C | -3.191444000 | 1.259214000  | 0.188474000  |
| H | -3.786034000 | -1.170616000 | 1.283361000  |
| H | -2.036573000 | -0.158793000 | -0.995514000 |
| H | -0.556189000 | 1.583881000  | 1.302523000  |

|    |              |              |              |
|----|--------------|--------------|--------------|
| H  | -2.074644000 | 2.364989000  | -1.325660000 |
| H  | -3.148588000 | 1.169763000  | 1.282292000  |
| O  | -4.440732000 | 1.817301000  | -0.191977000 |
| H  | -4.574206000 | 2.613372000  | 0.341615000  |
| O  | -4.052465000 | -0.413166000 | -1.369661000 |
| H  | -4.148572000 | -1.384286000 | -1.411241000 |
| O  | -2.229417000 | 3.450993000  | 0.473265000  |
| H  | -1.802861000 | 4.159372000  | -0.033851000 |
| O  | 0.261305000  | 1.908867000  | -0.539119000 |
| H  | 1.123533000  | 1.756793000  | -0.096342000 |
| O  | -1.775906000 | -0.900750000 | 1.493521000  |
| C  | -2.733652000 | -2.634056000 | 0.095241000  |
| H  | -2.543384000 | -3.326345000 | 0.926411000  |
| H  | -1.889271000 | -2.677897000 | -0.602282000 |
| O  | -3.890818000 | -3.053766000 | -0.655283000 |
| H  | -4.629825000 | -3.154507000 | -0.037640000 |
| Cl | 6.113973000  | 0.230401000  | -0.787943000 |
| Cl | 0.842541000  | -1.736566000 | 0.030973000  |
| H  | -0.943462000 | -1.119352000 | 1.012450000  |
| Sr | 3.405964000  | -0.140632000 | 0.383688000  |

**Ca<sup>2+</sup>+β-D-Fructofuranose**

E= -1364.90604

G= -1364.751674

|   |              |              |              |
|---|--------------|--------------|--------------|
| C | -1.859671000 | -0.082297000 | 0.136905000  |
| C | -1.145152000 | -1.433398000 | 0.137229000  |
| C | 0.323657000  | -1.045329000 | -0.109203000 |
| C | -1.099414000 | 0.683509000  | -0.941059000 |
| H | -1.503160000 | -2.019788000 | -0.718078000 |
| H | -1.533456000 | 0.439848000  | -1.921347000 |
| O | 0.260664000  | 0.157707000  | -0.892001000 |
| O | -3.236753000 | -0.142189000 | -0.213471000 |
| H | -3.718721000 | -0.523036000 | 0.533464000  |
| O | 0.955945000  | -0.708885000 | 1.121311000  |
| C | 1.109779000  | -2.122623000 | -0.837272000 |
| H | 0.935042000  | -3.081441000 | -0.330652000 |
| H | 0.744357000  | -2.184036000 | -1.870729000 |
| O | 2.497804000  | -1.774687000 | -0.792313000 |
| H | 3.015442000  | -2.575563000 | -0.945878000 |
| O | -1.343929000 | -2.229770000 | 1.289155000  |
| H | -0.905530000 | -1.788642000 | 2.033085000  |
| H | -1.738571000 | 0.386833000  | 1.124625000  |
| C | -1.057605000 | 2.192794000  | -0.797629000 |
| H | -0.509364000 | 2.628066000  | -1.640347000 |

|    |              |              |              |
|----|--------------|--------------|--------------|
| H  | -2.082667000 | 2.584689000  | -0.801320000 |
| O  | -0.354673000 | 2.617218000  | 0.385553000  |
| Ca | 1.926603000  | 1.615679000  | 0.475075000  |
| H  | -0.911743000 | 2.473095000  | 1.163346000  |
| H  | 1.814288000  | -1.164696000 | 1.152637000  |

### Ca<sup>2+</sup>+β-D-Fructopyranose

E= -1364.907474

G= -1364.750756

|    |              |              |              |
|----|--------------|--------------|--------------|
| C  | -0.432563000 | 1.060397000  | 0.425219000  |
| C  | 0.584544000  | 2.178562000  | 0.200825000  |
| C  | 1.958952000  | 1.674803000  | 0.608205000  |
| C  | 1.443540000  | -0.622687000 | 0.116750000  |
| C  | 0.003395000  | -0.220700000 | -0.269232000 |
| H  | 2.728396000  | 2.404921000  | 0.341232000  |
| H  | 0.325810000  | 3.035835000  | 0.836085000  |
| H  | -0.520245000 | 0.877827000  | 1.502431000  |
| H  | 1.979700000  | 1.505702000  | 1.692271000  |
| O  | 2.320072000  | 0.464563000  | -0.087073000 |
| O  | 0.614548000  | 2.583024000  | -1.176880000 |
| H  | -0.048737000 | 3.273904000  | -1.304146000 |
| O  | -1.757890000 | 1.418396000  | -0.006089000 |
| C  | 1.977886000  | -1.742200000 | -0.781620000 |
| H  | 3.011951000  | -1.966310000 | -0.487568000 |
| H  | 1.956020000  | -1.414265000 | -1.825929000 |
| O  | 1.154365000  | -2.913502000 | -0.699572000 |
| H  | 1.299631000  | -3.319505000 | 0.167748000  |
| O  | 1.509383000  | -1.025027000 | 1.481382000  |
| H  | 0.629870000  | -1.322248000 | 1.760411000  |
| H  | -0.022636000 | -0.077678000 | -1.357125000 |
| O  | -0.940220000 | -1.240461000 | 0.106373000  |
| Ca | -3.271274000 | -0.544407000 | 0.056640000  |
| H  | -1.709195000 | 1.705879000  | -0.932344000 |
| H  | -0.621668000 | -2.080911000 | -0.271871000 |

### Ca<sup>2+</sup>+α-D-Fructofuranose

E= -1364.906715

G= -1364.748074

|   |             |              |              |
|---|-------------|--------------|--------------|
| C | 1.597141000 | 0.916545000  | -0.273088000 |
| C | 1.901829000 | -0.536553000 | 0.072559000  |
| C | 0.512024000 | -1.120536000 | 0.402799000  |
| C | 0.490398000 | 1.242920000  | 0.722408000  |

|    |              |              |              |
|----|--------------|--------------|--------------|
| H  | 2.509199000  | -0.565983000 | 0.987152000  |
| H  | 0.946883000  | 1.423924000  | 1.707495000  |
| O  | -0.302454000 | 0.028392000  | 0.768254000  |
| O  | 2.688170000  | 1.806939000  | -0.085558000 |
| H  | 3.317216000  | 1.666246000  | -0.806344000 |
| O  | 0.635912000  | -1.974566000 | 1.516700000  |
| H  | -0.221531000 | -2.383264000 | 1.710659000  |
| C  | -0.137274000 | -1.802572000 | -0.803450000 |
| H  | 0.359108000  | -2.757588000 | -1.003931000 |
| H  | -0.040559000 | -1.150933000 | -1.677187000 |
| O  | -1.547284000 | -1.998336000 | -0.612082000 |
| H  | 1.226037000  | 0.974566000  | -1.307470000 |
| O  | 2.578094000  | -1.179438000 | -0.997765000 |
| H  | 2.943720000  | -2.013792000 | -0.672632000 |
| C  | -0.411496000 | 2.420481000  | 0.397063000  |
| H  | -1.038551000 | 2.654664000  | 1.264218000  |
| H  | 0.209775000  | 3.295407000  | 0.165050000  |
| O  | -1.331294000 | 2.143104000  | -0.674811000 |
| Ca | -2.657586000 | 0.111327000  | -0.062506000 |
| H  | -0.842785000 | 2.061270000  | -1.506702000 |
| H  | -1.701683000 | -2.761526000 | -0.037839000 |

## Reference

1. J. Tang, X. Guo, L. Zhu and C. Hu, *ACS Catal.*, 2015, **5**, 5097–5103.
2. V. Choudhary, S. H. Mushrif, C. Ho, A. Anderko, V. Nikolakis, N. S. Marinkovic, A. I. Frenkel, S. I. Sandler and D. G. Vlachos, *J. Am. Chem. Soc.*, 2013, **135**, 3997–4006.
3. A. I. M. Rabee, S. D. Le and S. Nishimura, *Chem. – Asian J.*, 2020, **15**, 294–300.
4. I. K. M. Yu, A. Hanif, D. C. W. Tsang, A. C. K. Yip, K.-Y. A. Lin, B. Gao, Y. S. Ok, C. S. Poon and J. Shang, *Sci. Total Environ.*, 2020, **704**, 135414.
5. I. K. M. Yu, X. Xiong, D. C. W. Tsang, Y. H. Ng, J. H. Clark, J. Fan, S. Zhang, C. Hu and Y. S. Ok, *Green Chem.*, 2019, **21**, 4341–4353.
6. T. Witvrouwen, J. Dijkmans, S. Paulussen and B. Sels, *J. Energy Chem.*, 2013, **22**, 451–458.
7. S. Saravanamurugan, M. Paniagua, J. A. Melero and A. Riisager, *J. Am. Chem. Soc.*, 2013, **135**, 5246–5249.
8. C. M. Lew, N. Rajabbeigi and M. Tsapatsis, *Microporous Mesoporous Mater.*, 2012, **153**, 55–58.
9. L. Botti, S. A. Kondrat, R. Navar, D. Padovan, J. S. Martinez-Espin, S. Meier and C. Hammond, *Angew. Chem. Int. Ed.*, 2020, **59**, 20017 – 20023.
10. J. Dijkmans, D. Gabriëls, M. Dusselier, F. de Clippel, P. Vanelderren, K.

- Houthoofd, A. Malfliet, Y. Pontikes and B. F. Sels, *Green Chem.*, 2013, **15**, 2777.
11. S. D. a. B. S. Sudipta De, *Green Chem.*, 2011, **13**, 2859 – 2868
  12. R. J. J. Ganado, D. E. C. Yu and F. C. Franco, *Ind. Eng. Chem. Res.*, 2019, **58**, 14621–14631.
  13. Y. Su, G. Chang, Z. Zhang, H. Xing, B. Su, Q. Yang, Q. Ren, Y. Yang and Z. Bao, *AIChE Journal*, 2016, **62**, 4403–4417.
  14. F. Shahangi, A. Najafi Chermahini and M. Saraji, *J. Energy Chem.*, 2018, **27**, 769–780.
  15. W. Guo, H. J. Heeres and J. Yue, *Chem. Eng. J.*, 2020, **381**, 122754.
  16. S. Xu, D. Pan, F. Hu, Y. Wu, H. Wang, Y. Chen, H. Yuan, L. Gao and G. Xiao, *Fuel Process. Technol.*, 2019, **190**, 38–46.
  17. X. Li, Q. Xia, V. C. Nguyen, K. Peng, X. Liu, N. Essayem and Y. Wang, *Catal. Sci. Technol.*, 2016, **6**, 7586–7596.
  18. K. T. V. Rao, S. Souzanchi, Z. Yuan, M. B. Ray and C. Xu, *RSC Adv.*, 2017, **7**, 48501–48511.
  19. E. Sezgin, M. Esen Keçeci, S. Akmaz and S. N. Koc, *Cellulose*, 2019, **26**, 9035–9043.
